# Supplementary material
Source: PubMed Central journal article supplement (PMC5974487)
Supplement: JVI.00436-18_zjv012183616s1.pdf [file JVI.00436-18_zjv012183616s1.pdf]

1 **Table A1:** Metadata of the analyzed 198 unique VHSV isolates including information on overall  
2 genotype- (GT) based on the G gene, sublineage- (SL) and clade (CL) affiliation, as well as the isolate  
3 name, host origin, environment of isolation (Env), country of isolation (C), year of isolation (Year),  
4 official NCBI accession number (Acc No.), the six amino acid sites detected under positive selection  
5 (aa6, aa212, aa258, aa259, aa505, aa506), and the associated positive selection site restricted  
6 haplotype (Haplo) that was generated based on the amino acid combinations at sites that undergo  
7 positive selection. Amino acids identified under positive selection are listed using standard one letter  
8 abbreviations and are color coded according to chemical characteristics: light grey) neutral, nonpolar  
9 amino acids; dark grey) neutral, polar amino acids; orange) acidic amino acids; and blue) basic amino  
10 acids. Dotted horizontal lines separate the different phylogenetic groups.

| GT | SL   | CL   | Isolate     | Host <sup>a</sup> | Env <sup>b</sup> | C <sup>c</sup> | Year | Acc No.    | Sites under positive selection <sup>d</sup> |     |     |     |     |     |       |
|----|------|------|-------------|-------------------|------------------|----------------|------|------------|---------------------------------------------|-----|-----|-----|-----|-----|-------|
|    |      |      |             |                   |                  |                |      |            | 6                                           | 212 | 258 | 259 | 505 | 506 | Haplo |
| I  | n.a. | n.a. | DK-F1       | RT                | FW               | DK             | 1962 | AF345857.1 | F                                           | T   | T   | E   | Q   | T   | H39   |
| I  | n.a. | n.a. | DK-Hededam  | RT                | FW               | DK             | 1970 | U28798.1   | F                                           | K   | T   | D   | Q   | T   | H26   |
| I  | Ia   | n.a. | FR-0284     | RT                | FW               | FR             | 1984 | U28800     | F                                           | K   | T   | E   | Q   | T   | H27   |
| I  | Ia   | Ia-1 | Dau170-04   | RT                | FW               | DE             | 2004 | EU708742.1 | F                                           | E   | E   | K   | Q   | M   | H2    |
| I  | Ia   | Ia-1 | Dau42-99    | RT                | FW               | DE             | 1999 | EU708739.1 | F                                           | N   | A   | D   | Q   | T   | H28   |
| I  | Ia   | Ia-1 | Dfr195-05   | RT                | FW               | DE             | 2005 | EU708760.1 | F                                           | K   | A   | D   | Q   | T   | H6    |
| I  | Ia   | Ia-1 | DK-200027-3 | RT                | FW               | DK             | 2000 | AY546609.1 | F                                           | K   | E   | D   | Q   | M   | H10   |
| I  | Ia   | Ia-1 | DK-200079-1 | RT                | FW               | DK             | 2000 | AY546613.1 | F                                           | K   | E   | D   | Q   | T   | H11   |
| I  | Ia   | Ia-1 | DK-204022   | RT                | FW               | DK             | 2004 | JF681347.1 | F                                           | K   | E   | D   | Q   | M   | H10   |
| I  | Ia   | Ia-1 | DK-204038   | RT                | FW               | DK             | 2004 | JF681342.1 | F                                           | K   | K   | D   | Q   | M   | H23   |
| I  | Ia   | Ia-1 | DK-204062   | RT                | FW               | DK             | 2004 | JF681314.1 | F                                           | K   | E   | D   | Q   | M   | H10   |
| I  | Ia   | Ia-1 | DK-204070   | RT                | FW               | DK             | 2004 | JF681334.1 | F                                           | K   | G   | D   | Q   | M   | H19   |
| I  | Ia   | Ia-1 | DK-204129   | RT                | FW               | DK             | 2004 | JF681340.1 | F                                           | K   | G   | D   | Q   | M   | H19   |
| I  | Ia   | Ia-1 | DK-204249   | RT                | FW               | DK             | 2004 | JF681348.1 | F                                           | K   | K   | D   | Q   | M   | H23   |
| I  | Ia   | Ia-1 | DK-204408-1 | RT                | FW               | DK             | 2004 | JF681338.1 | F                                           | K   | E   | D   | Q   | M   | H10   |
| I  | Ia   | Ia-1 | DK-205001   | RT                | FW               | DK             | 2005 | JF681308.1 | F                                           | K   | E   | D   | Q   | M   | H10   |
| I  | Ia   | Ia-1 | DK-205061   | RT                | FW               | DK             | 2005 | JF681345   | F                                           | K   | G   | D   | Q   | M   | H19   |
| I  | Ia   | Ia-1 | DK-205070   | RT                | FW               | DK             | 2005 | JF681328.1 | F                                           | K   | G   | D   | Q   | M   | H19   |
| I  | Ia   | Ia-1 | DK-205090   | RT                | FW               | DK             | 2005 | JF681333.1 | F                                           | K   | G   | D   | Q   | M   | H19   |
| I  | Ia   | Ia-1 | DK-205107   | RT                | FW               | DK             | 2005 | JF681354.1 | F                                           | K   | G   | D   | Q   | M   | H19   |
| I  | Ia   | Ia-1 | DK-205297-1 | RT                | FW               | DK             | 2005 | JF681332.1 | F                                           | K   | G   | D   | Q   | M   | H19   |
| I  | Ia   | Ia-1 | DK-205363   | RT                | FW               | DK             | 2005 | JF681339.1 | F                                           | K   | K   | D   | Q   | M   | H23   |
| I  | Ia   | Ia-1 | DK-205416   | RT                | FW               | DK             | 2005 | JF681346.1 | F                                           | K   | E   | D   | Q   | M   | H10   |
| I  | Ia   | Ia-1 | DK-206130   | RT                | FW               | DK             | 2006 | JF681329.1 | F                                           | K   | G   | D   | Q   | M   | H19   |
| I  | Ia   | Ia-1 | DK-206262   | RT                | FW               | DK             | 2006 | JF681313.1 | F                                           | K   | G   | D   | Q   | M   | H19   |

|   |    |      |             |    |    |    |      |            |   |   |   |   |   |   |     |
|---|----|------|-------------|----|----|----|------|------------|---|---|---|---|---|---|-----|
| I | Ia | Ia-1 | DK-207017   | RT | FW | DK | 2007 | JF681321   | F | K | E | D | Q | M | H10 |
| I | Ia | Ia-1 | DK-207023   | RT | FW | DK | 2007 | JF681355.1 | F | K | E | D | Q | M | H10 |
| I | Ia | Ia-1 | DK-207048   | RT | FW | DK | 2007 | JF681356.1 | F | K | E | D | Q | M | H10 |
| I | Ia | Ia-1 | DK-207057   | RT | FW | DK | 2007 | JF681322.1 | F | K | E | D | Q | M | H10 |
| I | Ia | Ia-1 | DK-207076-2 | RT | FW | DK | 2007 | JF681344.1 | F | K | E | D | Q | M | H10 |
| I | Ia | Ia-1 | DK-207081   | RT | FW | DK | 2007 | JF681316.1 | F | K | E | D | Q | M | H10 |
| I | Ia | Ia-1 | DK-207085   | RT | FW | DK | 2007 | JF681350.1 | F | K | E | D | Q | M | H10 |
| I | Ia | Ia-1 | DK-207193   | RT | FW | DK | 2007 | JF681337.1 | F | K | E | D | Q | M | H10 |
| I | Ia | Ia-1 | DK-207227   | RT | FW | DK | 2007 | JF681318.1 | F | K | E | D | Q | M | H10 |
| I | Ia | Ia-1 | DK-208048   | RT | FW | DK | 2008 | JF681336.1 | F | K | K | D | Q | M | H23 |
| I | Ia | Ia-1 | DK-208195-2 | RT | FW | DK | 2008 | JF681353.1 | F | K | E | N | Q | M | H15 |
| I | Ia | Ia-1 | DK-209005-1 | RT | FW | DK | 2008 | JF681352.1 | F | K | E | D | Q | M | H10 |
| I | Ia | Ia-1 | DK-5151     | RT | FW | DK | 1988 | AF345859.1 | F | N | A | D | Q | T | H28 |
| I | Ia | Ia-1 | DK-6045     | RT | FW | DK | 1991 | AY546592.1 | F | N | A | D | Q | T | H28 |
| I | Ia | Ia-1 | DK-6137     | RT | FW | DK | 1991 | AY546593.1 | F | K | A | D | Q | T | H6  |
| I | Ia | Ia-1 | DK-7380     | RT | FW | DK | 1994 | AY546594.1 | F | N | K | D | Q | T | H31 |
| I | Ia | Ia-1 | DK-7974     | RT | FW | DK | 1994 | AY546595.1 | F | N | A | D | Q | T | H28 |
| I | Ia | Ia-1 | DK-9595168  | RT | FW | DK | 1995 | AY546596.1 | F | N | E | D | Q | T | H29 |
| I | Ia | Ia-1 | DK-9795568  | RT | FW | DK | 1997 | AY546598.1 | F | K | K | D | Q | T | H24 |
| I | Ia | Ia-1 | DK-9895093  | RT | FW | DK | 1998 | AY546600.1 | F | N | K | D | Q | T | H31 |
| I | Ia | Ia-1 | DK-9995007  | RT | FW | DK | 1999 | AY546601.1 | F | K | K | D | Q | T | H24 |
| I | Ia | Ia-1 | Dns46-07    | RT | FW | DE | 2007 | EU708769.1 | F | K | G | D | Q | M | H19 |
| I | Ia | Ia-1 | Dns6-07     | RT | FW | DE | 2007 | EU708767.1 | F | K | G | D | Q | M | H19 |
| I | Ia | Ia-1 | Dri01-06    | G  | FW | DE | 2006 | EU708772.1 | F | K | E | D | L | M | H9  |
| I | Ia | Ia-1 | Dsteinbutt  | T  | M  | DE | 1991 | EU708793.1 | F | N | A | D | Q | T | H28 |
| I | Ia | Ia-1 | Dstg22-03   | RT | FW | DE | 2003 | EU708794.1 | F | K | E | D | Q | M | H10 |
| I | Ia | Ia-1 | UK-J167     | RT | FW | UK | 2001 | JN180851.1 | F | K | E | D | Q | M | H10 |
| I | Ia | Ia-2 | Au28-95     | RT | FW | AT | 1995 | EU708729.1 | F | E | A | D | Q | T | H1  |
| I | Ia | Ia-2 | Au299-94    | RT | FW | AT | 1994 | EU708732.1 | F | K | E | E | Q | T | H1  |
| I | Ia | Ia-2 | Au77-99     | RT | FW | AT | 1999 | EU708731.1 | F | K | E | E | Q | T | H13 |
| I | Ia | Ia-2 | AU-8-95     | RT | FW | AT | 1995 | AY546570.1 | F | E | A | D | Q | T | H13 |
| I | Ia | Ia-2 | Au917-04    | RT | FW | AT | 2004 | EU708733.1 | F | K | G | E | Q | T | H21 |
| I | Ia | Ia-2 | CH-FI262BFH | RT | FW | CH | 1999 | AY546571.1 | F | K | G | E | Q | M | H20 |
| I | Ia | Ia-2 | Dau1124-00  | RT | FW | DE | 2000 | EU708749.1 | F | K | E | E | Q | T | H13 |
| I | Ia | Ia-2 | Dau1402-97  | RT | FW | DE | 1997 | EU708750.1 | F | E | T | D | Q | T | H5  |
| I | Ia | Ia-2 | Dau1556-98  | RT | FW | DE | 1998 | EU708752.1 | F | K | E | E | Q | T | H13 |
| I | Ia | Ia-2 | Dau201-05   | RT | FW | DE | 2005 | EU708743.1 | F | K | G | A | Q | M | H17 |
| I | Ia | Ia-2 | Dau24-02    | RT | FW | DE | 2002 | EU708737.1 | F | K | G | A | Q | M | H17 |
| I | Ia | Ia-2 | Dau412-02   | RT | FW | DE | 2002 | EU708744.1 | F | K | G | E | Q | T | H21 |
| I | Ia | Ia-2 | Dau52-98    | RT | FW | DE | 1998 | EU708740.1 | F | K | E | E | Q | T | H13 |
| I | Ia | Ia-2 | Dau543-03   | RT | FW | DE | 2003 | EU708747.1 | F | K | G | A | Q | M | H17 |
| I | Ia | Ia-2 | Dau56-02    | RT | FW | DE | 2002 | EU708741.1 | F | E | T | D | Q | T | H5  |
| I | Ia | Ia-2 | Dau686-97   | RT | FW | DE | 1997 | EU708748.1 | F | E | T | D | Q | T | H5  |
| I | Ia | Ia-2 | Db359-92    | RT | FW | DE | 1992 | EU708755.1 | P | E | T | D | Q | T | H44 |
| I | Ia | Ia-2 | Db416-92    | RT | FW | DE | 1992 | EU708756.1 | P | E | T | D | Q | T | H44 |
| I | Ia | Ia-2 | Db493-08    | RT | FW | DE | 2008 | EU708757.1 | F | K | G | A | Q | T | H18 |

|   |    |      |             |    |    |    |      |            |   |   |   |   |   |   |     |
|---|----|------|-------------|----|----|----|------|------------|---|---|---|---|---|---|-----|
| I | Ia | Ia-2 | Db905-03    | RT | FW | DE | 2003 | EU708758.1 | F | K | G | A | Q | T | H18 |
| I | Ia | Ia-2 | Dfr148-07   | RT | FW | DE | 2007 | EU708762.1 | F | K | G | A | Q | M | H17 |
| I | Ia | Ia-2 | Dfr2247-06  | RT | FW | DE | 2006 | EU708764   | F | K | G | A | Q | M | H17 |
| I | Ia | Ia-2 | Dfr2868-06  | RT | FW | DE | 2006 | EU708765.1 | F | K | G | A | Q | M | H17 |
| I | Ia | Ia-2 | Dfr378-07   | RT | FW | DE | 2007 | EU708763.1 | F | K | G | A | Q | M | H17 |
| I | Ia | Ia-2 | Dfr404-05   | RT | FW | DE | 2005 | EU708761.1 | F | K | E | E | Q | T | H13 |
| I | Ia | Ia-2 | DK-200098   | RT | FW | DK | 2000 | AY546605.1 | F | K | K | E | Q | T | H25 |
| I | Ia | Ia-2 | DK-204157   | RT | FW | DK | 2004 | JF681357.1 | F | K | E | K | Q | T | H14 |
| I | Ia | Ia-2 | DK-208037-1 | RT | FW | DK | 2008 | JF681359.1 | F | K | E | K | Q | T | H14 |
| I | Ia | Ia-2 | DK-208308-1 | RT | FW | DK | 2008 | JF681358.1 | F | K | E | K | Q | T | H14 |
| I | Ia | Ia-2 | DK-9995144  | RT | FW | DK | 1999 | AY546602.1 | F | K | K | E | Q | T | H25 |
| I | Ia | Ia-2 | Dns13462-03 | RT | FW | DE | 2003 | EU708771.1 | F | K | G | A | L | T | H16 |
| I | Ia | Ia-2 | Dns166-06   | RT | FW | DE | 2006 | EU708770.1 | F | K | G | A | Q | T | H18 |
| I | Ia | Ia-2 | Dri04-08    | RT | FW | DE | 2008 | EU708775.1 | F | K | G | A | Q | M | H17 |
| I | Ia | Ia-2 | Dri07-05    | RT | FW | DE | 2005 | EU708773.1 | F | K | T | D | Q | T | H26 |
| I | Ia | Ia-2 | Dri47-06    | RT | FW | DE | 2006 | EU708776.1 | F | K | T | D | Q | T | H26 |
| I | Ia | Ia-2 | Dsa05-00    | RT | FW | DE | 2000 | EU708777.1 | F | E | T | D | L | T | H4  |
| I | Ia | Ia-2 | Dsa12-99    | RT | FW | DE | 1999 | EU708779.1 | F | K | E | E | Q | T | H13 |
| I | Ia | Ia-2 | Dsa141-7-94 | RT | FW | DE | 1994 | EU708784.1 | F | K | E | E | L | T | H12 |
| I | Ia | Ia-2 | Dsa142-96   | RT | FW | DE | 1996 | EU708785.1 | F | K | A | D | Q | T | H6  |
| I | Ia | Ia-2 | Dsa14893-05 | RT | FW | DE | 2005 | EU708787.1 | F | K | T | D | Q | T | H26 |
| I | Ia | Ia-2 | Dsa14894-05 | RT | FW | DE | 2005 | EU708788.1 | F | N | G | A | Q | M | H30 |
| I | Ia | Ia-2 | Dsa19-7-93  | RT | FW | DE | 1993 | EU708780.1 | F | K | K | D | Q | T | H24 |
| I | Ia | Ia-2 | Dsa21583-03 | RT | FW | DE | 2003 | EU708790.1 | F | K | T | D | Q | T | H26 |
| I | Ia | Ia-2 | Dsa67-01    | RT | FW | DE | 2001 | EU708781.1 | F | E | S | D | Q | T | H3  |
| I | Ia | Ia-2 | Dsa6915-02  | RT | FW | DE | 2002 | EU708786.1 | F | E | T | D | Q | T | H5  |
| I | Ia | Ia-2 | Dsa82-99    | RT | FW | DE | 1999 | EU708782.1 | F | E | T | D | Q | T | H5  |
| I | Ia | Ia-2 | Dsa90-98    | RT | FW | DE | 1998 | EU708783.1 | F | K | E | E | Q | T | H13 |
| I | Ia | Ia-2 | Dstg21-07   | RT | FW | DE | 2007 | EU708804.1 | F | K | G | A | Q | M | H17 |
| I | Ia | Ia-2 | Dstg28-06   | RT | FW | DE | 2006 | EU708805.1 | F | K | G | A | Q | M | H17 |
| I | Ia | Ia-2 | Dstg31-07   | RT | FW | DE | 2007 | EU708806.1 | F | K | G | A | Q | M | H17 |
| I | Ia | Ia-2 | Dstg36-06   | RT | FW | DE | 2006 | EU708807.1 | F | K | G | T | Q | M | H22 |
| I | Ia | Ia-2 | Dstg42-06   | RT | FW | DE | 2006 | EU708808.1 | F | K | G | A | Q | M | H17 |
| I | Ia | Ia-2 | Dstg44-04   | RT | FW | DE | 2004 | EU708798.1 | F | K | G | A | Q | M | H17 |
| I | Ia | Ia-2 | Dstg50-2-04 | RT | FW | DE | 2004 | EU708800.1 | F | K | G | T | Q | M | H22 |
| I | Ia | Ia-2 | Dstg54-1-07 | RT | FW | DE | 2007 | EU708809.1 | F | K | G | A | Q | T | H18 |
| I | Ia | Ia-2 | Dstg74-03   | RT | FW | DE | 2003 | EU708801.1 | F | K | G | A | Q | M | H17 |
| I | Ia | Ia-2 | Dstg8-06    | RT | FW | DE | 2006 | EU708803.1 | F | K | G | A | Q | M | H17 |
| I | Ia | Ia-2 | Dstg82-1-07 | RT | FW | DE | 2007 | EU708810.1 | F | K | T | D | Q | T | H26 |
| I | Ia | Ia-2 | Dstg89-1-07 | RT | FW | DE | 2007 | EU708811.1 | F | K | T | D | Q | T | H26 |
| I | Ia | Ia-2 | Dvgeig      | RT | FW | DE | 2007 | EU708812.1 | F | K | T | E | Q | T | H27 |
| I | Ia | Ia-2 | Dwb86-04    | RT | FW | DE | 2004 | EU708814.1 | F | K | G | A | Q | M | H17 |
| I | Ia | Ia-2 | Dwb88-04    | RT | FW | DE | 2004 | EU708815.1 | F | K | G | A | Q | M | H17 |
| I | Ia | Ia-2 | FR-0771     | RT | FW | FR | 1971 | AY546616.1 | F | K | T | E | Q | T | H27 |
| I | Ia | Ia-2 | Slo1455-07  | RT | FW | SI | 2007 | GQ292534.1 | F | K | G | A | Q | M | H17 |
| I | Ia | Ia-3 | Dfi13-83    | RT | FW | DE | 1983 | EU708759.1 | F | K | A | E | L | T | H7  |

|    |      |      |                 |     |    |    |      |            |   |   |   |   |   |   |     |
|----|------|------|-----------------|-----|----|----|------|------------|---|---|---|---|---|---|-----|
| I  | Ia   | Ia-3 | DK-3592b        | RT  | FW | DK | 1986 | X66134     | F | K | A | E | Q | T | H8  |
| I  | Ia   | Ia-3 | DK-3946         | RT  | FW | DK | 1987 | AY546586.1 | F | K | A | E | Q | T | H8  |
| I  | Ia   | Ia-3 | DK-3971         | RT  | FW | DK | 1987 | AY546587.1 | F | K | A | E | Q | T | H8  |
| I  | Ia   | Ia-3 | Fil3            | RT  | FW | DE | 1983 | Y18263.1   | F | K | A | E | Q | T | H8  |
| I  | Ia   | Ia-4 | DK-5741         | RT  | FW | DK | 1990 | AY546591.1 | F | K | T | E | Q | T | H27 |
| I  | Ia   | Ia-4 | DK-9695377      | RT  | FW | DK | 1996 | AY546597.1 | F | K | T | E | Q | T | H27 |
| I  | Ia   | Ia-4 | DK-9895024      | RT  | FW | DK | 1998 | AY546599.1 | F | K | T | E | Q | T | H27 |
| I  | Ia   | Ia-4 | DK-9895174      | RT  | FW | DK | 1998 | AY546603.1 | F | K | T | E | Q | T | H27 |
| I  | Ia   | Ia-4 | Dsan152         | RT  | FW | DE | 2001 | EU708791.1 | F | K | T | E | Q | T | H27 |
| I  | Ib   | n.a. | CH150208        | H   | M  | NO | 2008 | FJ384761.1 | F | T | A | E | Q | M | H35 |
| I  | Ib   | n.a. | Dglaaal         | Eel | M  | DE | 1999 | EU708766.1 | F | T | T | E | Q | M | H38 |
| I  | Ib   | n.a. | DK-1p40         | R   | M  | DK | 1996 | AY546575.1 | F | T | T | E | Q | M | H38 |
| I  | Ib   | n.a. | DK-1p8          | AH  | M  | DK | 1996 | AY546573.1 | F | T | T | E | Q | M | H38 |
| I  | Ib   | n.a. | DK-1p86         | S   | M  | DK | 1996 | AY546579.1 | F | T | T | E | Q | M | H38 |
| I  | Ib   | n.a. | DK-4p37         | BW  | M  | DK | 1997 | FJ460590.1 | F | T | T | E | Q | M | H38 |
| I  | Ib   | n.a. | DK-5e59         | Dab | M  | DK | 1998 | AY546583.1 | F | T | T | E | Q | M | H38 |
| I  | Ib   | n.a. | DK-6p403        | AH  | M  | DK | 1999 | AY546584.1 | F | T | T | E | Q | M | H38 |
| I  | Ib   | n.a. | DK-M.rhabdo     | Cod | M  | DK | 1979 | Z93414     | F | T | T | E | Q | M | H38 |
| I  | Ib   | n.a. | KRRV9601        | JF  | M  | JP | 1996 | AB672614.1 | F | T | T | E | Q | M | H38 |
| I  | Ib   | n.a. | NO-R-190310-174 | AH  | M  | NO | 2010 | JQ755260.1 | F | T | A | E | Q | M | H35 |
| I  | Ib   | n.a. | NO-R-220410-239 | AH  | M  | NO | 2010 | JQ755265.1 | F | T | T | E | Q | M | H38 |
| I  | Ib   | n.a. | SE-SVA-1033     | RT  | M  | SE | 2000 | FJ460591.1 | F | T | T | E | Q | M | H38 |
| I  | Ib   | n.a. | SE-SVA14        | RT  | M  | SE | 1998 | AY546622.1 | F | T | T | E | Q | M | H38 |
| I  | Ib   | n.a. | SE-SVA31        | AH  | M  | SE | 2000 | AY546626.1 | F | T | T | E | Q | M | H38 |
| I  | Ib   | n.a. | SE-SVA32        | PG  | M  | SE | 2000 | AY546627.1 | F | T | T | E | Q | M | H38 |
| I  | Ib   | n.a. | UK-9643         | AH  | M  | UK | 1996 | AF143862   | F | T | T | E | Q | M | H38 |
| I  | Ib   | n.a. | UK-MLA98-6HE1   | H   | M  | UK | 1998 | AY546631.1 | F | T | T | E | Q | M | H38 |
| I  | Ic   | n.a. | Au62-96         | RT  | FW | AT | 1996 | EU708730.1 | L | T | T | D | Q | T | H42 |
| I  | Ic   | n.a. | Dau10-97        | RT  | FW | DE | 1997 | EU708736.1 | F | T | T | D | Q | T | H37 |
| I  | Ic   | n.a. | Dau9-97         | RT  | FW | DE | 1997 | EU708735.1 | F | T | T | D | Q | T | H37 |
| I  | Ic   | n.a. | DK-2835         | RT  | FW | DK | 1982 | AY546585.1 | L | T | T | D | Q | T | H42 |
| I  | Ic   | n.a. | DK-5123         | RT  | FW | DK | 1988 | AY546588.1 | F | T | T | D | Q | T | H37 |
| I  | Ic   | n.a. | DK-5131         | RT  | FW | DK | 1988 | AF345858.1 | P | T | T | D | Q | T | H45 |
| I  | Ic   | n.a. | Dri12-95        | RT  | FW | DE | 1995 | EU708774.1 | F | T | T | D | Q | T | H37 |
| I  | Id   | n.a. | FI-ka422        | RT  | M  | FI | 2000 | AY546615.1 | L | T | T | E | Q | T | H43 |
| I  | Id   | n.a. | FI-ka66         | RT  | M  | FI | 2000 | AY546614.1 | F | T | T | E | Q | T | H39 |
| I  | Id   | n.a. | NO-A16368G      | RT  | M  | NO | 1968 | AY546621.1 | F | T | V | E | Q | T | H41 |
| I  | Ie   | n.a. | GE-1.2          | RT  | FW | GE | 1981 | AY546619.1 | F | T | T | D | Q | M | H36 |
| I  | If   | n.a. | Datt107         | RT  | FW | DE | n.a. | EU708734.1 | S | A | T | D | Q | T | H46 |
| I  | If   | n.a. | Dau1503-01      | RT  | FW | DE | 2001 | EU708751.1 | F | T | T | D | Q | T | H37 |
| I  | If   | n.a. | Daulab          | RT  | FW | DE | 2001 | EU708753.1 | F | T | T | D | Q | T | H37 |
| I  | If   | n.a. | FR-1458         | RT  | FW | FR | 1990 | AF143863   | F | T | T | D | Q | T | H37 |
| I  | If   | n.a. | FR-2375         | RT  | FW | FR | 1975 | AY546617.1 | F | T | T | D | Q | T | H37 |
| II | n.a. | n.a. | DK-1p53         | AH  | M  | DK | 1996 | AY546577.1 | F | T | T | E | Q | M | H38 |
| II | n.a. | n.a. | DK-1p55         | S   | M  | DK | 1996 | AY546578.1 | F | T | T | E | Q | M | H38 |
| II | n.a. | n.a. | FI-ka350_06     | BH  | M  | FI | 2006 | HQ112233.1 | F | T | T | E | Q | M | H38 |

|     |      |      |                   |     |    |    |      |            |   |   |   |   |   |   |     |
|-----|------|------|-------------------|-----|----|----|------|------------|---|---|---|---|---|---|-----|
| II  | n.a. | n.a. | FI-ka383_04       | BH  | M  | FI | 2004 | HQ112236.1 | F | T | T | E | Q | M | H38 |
| II  | n.a. | n.a. | FI-ka427_04       | BH  | M  | FI | 2004 | HQ112240.1 | F | T | T | E | Q | M | H38 |
| II  | n.a. | n.a. | FI-ka436_04       | BH  | M  | FI | 2004 | HQ112241.1 | F | T | T | E | Q | M | H38 |
| II  | n.a. | n.a. | FI-ka494_05       | BH  | M  | FI | 2005 | HQ112242.1 | F | T | T | E | Q | M | H38 |
| II  | n.a. | n.a. | FI-ka560_04       | BH  | M  | FI | 2004 | HQ112243.1 | F | T | T | E | Q | M | H38 |
| II  | n.a. | n.a. | FI-ka564_04       | BH  | M  | FI | 2004 | HQ112244.1 | F | T | T | E | Q | M | H38 |
| II  | n.a. | n.a. | FI-ka646_04       | BH  | M  | FI | 2004 | HQ112246.1 | F | T | T | E | Q | M | H38 |
| II  | n.a. | n.a. | FI-ka663_06       | BH  | M  | FI | 2006 | HQ112247.1 | F | T | T | E | Q | M | H38 |
| II  | n.a. | n.a. | FI-ka664_04       | BH  | M  | FI | 2004 | HQ112248.1 | F | T | T | E | Q | M | H38 |
| II  | n.a. | n.a. | FI-lamprey-739.03 | L   | FW | FI | 2003 | GQ504014.1 | F | T | T | E | Q | M | H38 |
| III | n.a. | n.a. | DK-4p101          | W   | M  | DK | 1997 | AY546581.1 | F | T | T | D | Q | M | H36 |
| III | n.a. | n.a. | DK-4p168          | AH  | M  | DK | 1997 | AY546582.1 | F | T | T | D | Q | M | H36 |
| III | n.a. | n.a. | FA280208-VG       | RT  | M  | NO | 2008 | GU121101.1 | F | T | T | D | Q | M | H36 |
| III | n.a. | n.a. | FR-L59X           | Eel | F  | FR | 1987 | AY546618.1 | F | T | T | D | Q | T | H37 |
| III | n.a. | n.a. | IR-F13.02.97      | T   | M  | IE | 1997 | AY546620.1 | F | T | T | D | Q | M | H36 |
| III | n.a. | n.a. | UK-860-94         | T   | M  | UK | 1994 | AY546628.1 | F | T | T | E | Q | V | H40 |
| III | n.a. | n.a. | UK-H17-2-95       | Ha  | M  | UK | 1995 | AY546629.1 | F | T | T | D | Q | M | H36 |
| III | n.a. | n.a. | UK-H17-5-93       | Cod | M  | UK | 1993 | AY546630.1 | F | T | T | D | Q | M | H36 |
| III | n.a. | n.a. | UK-MLA98-6PT11    | NP  | M  | UK | 1998 | AY546632.1 | F | T | T | D | Q | M | H36 |
| IV  | IVa  | n.a. | AY167587          | OF  | M  | KR | n.a. | AY167587.1 | F | Q | T | E | Q | M | H34 |
| IV  | IVa  | n.a. | BC93-372          | PH  | M  | CA | 1993 | DQ401186.1 | F | Q | T | E | Q | M | H34 |
| IV  | IVa  | n.a. | BC98-250          | AS  | M  | CA | 1998 | DQ401187.1 | F | Q | T | D | Q | M | H33 |
| IV  | IVa  | n.a. | BC99-001          | PS  | M  | CA | 1999 | DQ401195.1 | F | Q | T | E | Q | M | H34 |
| IV  | IVa  | n.a. | BC99-010          | PH  | M  | CA | 1999 | DQ401194.1 | F | Q | T | E | Q | M | H34 |
| IV  | IVa  | n.a. | BC99-292          | AS  | M  | CA | 1999 | DQ401188.1 | F | Q | T | D | Q | M | H33 |
| IV  | IVa  | n.a. | JF00Ehi1          | JF  | M  | JP | 2000 | AB490792.1 | F | Q | T | E | Q | M | H34 |
| IV  | IVa  | n.a. | JP99Obama25       | JF  | M  | JP | 1999 | DQ401191.1 | F | Q | T | E | Q | M | H34 |
| IV  | IVa  | n.a. | KJ2008            | OF  | M  | KR | 2008 | JF792424.1 | F | Q | T | E | Q | M | H34 |
| IV  | IVa  | n.a. | KR-CJA            | OF  | M  | KR | 2010 | JQ651388.1 | F | Q | T | E | Q | M | H34 |
| IV  | IVa  | n.a. | KRRV9822          | JF  | M  | JP | 1998 | AB179621.1 | F | Q | T | E | Q | M | H34 |
| IV  | IVa  | n.a. | US-Makah          | CS  | FW | US | 1988 | U28747.1   | F | Q | T | E | Q | M | H34 |
| IV  | IVa  | n.a. | WA91Clearwater    | CS  | M  | US | 1991 | DQ401189.1 | F | Q | T | D | Q | M | H33 |
| IV  | IVa  | n.a. | ME03              | AH  | M  | US | 2003 | DQ401192.1 | F | Q | T | E | Q | M | H34 |
| IV  | IVb  | n.a. | Goby1-5           | RG  | FW | US | 2006 | AB672615.1 | F | Q | A | E | P | M | H32 |
| IV  | IVb  | n.a. | MI03GL            | M   | FW | US | 2003 | GQ385941.1 | F | Q | A | E | P | M | H32 |

11 <sup>a</sup>Host species abbreviations: AH) Atlantic herring; AS) Atlantic salmon; BH) Baltic herring; BW) blue whiting; CS) coho  
12 salmon; G) grayling; H) herring; Ha) Haddock; JF) Japanese flounder; L) lamprey; M) muskellung; NP) Norway pout;  
13 OF) olive flounder; PG) rock gunnel; PH) Pacific herring; PS) Pacific sadine; R) rockling; RG) round goby; RT) rainbow  
14 trout; S) sprat; T) turbot;

15 <sup>b</sup> Environmental abbreviations: M) marine or brackish water; FW) freshwater;

16 <sup>c</sup> Geographic abbreviation: AT) Austria, CA) Canada; CH) Switzerland; DE) Germany; DK) Denmark; FI) Finland; FR)  
17 France; GE) Georgia; IE) Ireland; JP) Japan; KR) Korea; NO) Norway; SE) Sweden; SI) Slovenia; UK) United Kingdom;  
18 US) United States;

19 <sup>d</sup> Amino acid abbreviations: N) Asparagine; L) Leucine; P) Proline; D) Aspartate; E) Glutamate; Q) Glutamine; K)  
20 Lysine; T) Threonine, A) Alanine; V) Valine; S) Serine; F) Phenylalanine; G) Glycine; M) Methionine;  
21 Applied abbreviation: n.a. ~ no affiliation

22 **Table A2:** Parameters of codon substitution models used for detection of positive selection  
 23 pressures.

| Model                                | P | Parameter           | Notes                                                                                                                                                     |
|--------------------------------------|---|---------------------|-----------------------------------------------------------------------------------------------------------------------------------------------------------|
| M0 (one ratio) <sup>a</sup>          | 1 | $\omega$            | One $\omega$ ratio for all sites                                                                                                                          |
| M1 (neutral) <sup>a</sup>            | 1 | $p_0$               | Accounting for sites under purifying and neutral selection.<br><br>$p_1 = 1 - p_0, 0 < \omega_0 < 1, \omega_1 = 1,$                                       |
| M2 (positive selection) <sup>a</sup> | 3 | $p_0, p_1, \omega$  | Expansion of M1, with an additional site class accounting for positive selection.<br><br>$p_2 = 1 - p_0 - p_1, 0 < \omega_0 < 1, \omega_1 = 1$            |
| M7 (beta) <sup>b</sup>               | 2 | p, q                | $\omega$ is described by a beta distribution (B(p,q)), with p and q describing the shape of the distribution.                                             |
| M8 (beta& $\omega$ ) <sup>b</sup>    | 4 | $p_0, p, q, \omega$ | Expansion to M7 with an additional discrete site class accounting for positive selection.<br><br>$p_0$ drawn from B(p,q), $p_1 = 1 - p_0$ with $\omega_1$ |

24 <sup>a</sup> Discret model

25 <sup>b</sup> Continuous model

26 Applied abbreviations: P ~ number of free parameters in the  $\omega$  distribution

27

28 **Table A3:** Parameter estimates retrieved from evolutionary molecular analysis of VHSV G protein  
 29 sequences (complete coding region) employing substitution model M8. Sequences were divided into  
 30 sub-datasets based on phylogenetic reconstruction.

| <b>Dataset</b>    | <b>Tree length</b> | <b>p</b> | <b>q</b> | <b><math>\omega_1</math></b> | <b><math>p_0</math></b> | <b><math>p_1</math></b> | <b>Mean <math>\omega</math></b> |
|-------------------|--------------------|----------|----------|------------------------------|-------------------------|-------------------------|---------------------------------|
| <b>Genotype</b>   |                    |          |          |                              |                         |                         |                                 |
| I                 | n.a.               | n.a.     | n.a.     | n.a.                         | n.a.                    | n.a.                    | n.a.                            |
| II                | 0.089              | 26.772   | 99.000   | 3.754                        | 1.000                   | 0.000                   | 0.269                           |
| III               | 0.210              | 9.403    | 99.000   | 2.944                        | 0.951                   | 0.049                   | 0.244                           |
| IV                | 0.252              | 0.005    | 3.039    | 1.351                        | 0.778                   | 0.222                   | 0.320                           |
| <b>Sublineage</b> |                    |          |          |                              |                         |                         |                                 |
| Ia*               | 1.158              | 0.157    | 0.755    | 7.305                        | 0.991                   | 0.009                   | 0.236                           |
| Ib                | 0.114              | 19.735   | 99.000   | 9.420                        | 0.987                   | 0.013                   | 0.305                           |
| Ic*               | 0.151              | 16.932   | 99.000   | 26.336                       | 0.994                   | 0.006                   | 0.263                           |
| Id                | n.a.               | n.a.     | n.a.     | n.a.                         | n.a.                    | n.a.                    | n.a.                            |
| Ie                | n.a.               | n.a.     | n.a.     | n.a.                         | n.a.                    | n.a.                    | n.a.                            |
| If                | n.a.               | n.a.     | n.a.     | n.a.                         | n.a.                    | n.a.                    | n.a.                            |
| IVa               | 0.131              | 27.458   | 99.000   | 7.314                        | 0.982                   | 0.018                   | 0.360                           |
| IVb               | n.a.               | n.a.     | n.a.     | n.a.                         | n.a.                    | n.a.                    | n.a.                            |
| IVc               | n.a.               | n.a.     | n.a.     | n.a.                         | n.a.                    | n.a.                    | n.a.                            |
| <b>Clade</b>      |                    |          |          |                              |                         |                         |                                 |
| Ia-1*             | 0.323              | 0.013    | 0.076    | 19.503                       | 0.996                   | 0.004                   | 0.238                           |
| Ia-2*             | 0.689              | 0.263    | 1.219    | 5.427                        | 0.989                   | 0.011                   | 0.240                           |

31 \* datasets detected for positive selection;

32 p and q represent parameters of beta distribution indicating the shape of the distribution;

33  $\omega_1$ : strength of positive selection;

34  $p_0$ : proportion of amino acid sites under neutral or purifying selection;

35  $p_1$ : proportion of amino acid sites under positive selection

36

37



38 **Table A4:** Inferring gene-wide selection pressure along phylogenetic branches using the **Branch-Site**  
39 **Unrestricted Statistical Test for Episodic Diversification (BUSTED)** algorithm implemented in the  
40 HyPhy software package. BUSTED fits a codon model with three rate classes, constraining the dN/dS  
41 ratios as  $\omega_1 \leq \omega_2 \leq 1 \leq \omega_3$  (allowing positive selection) in the Alternative Model and comparing the  
42 model fit to the Null Model where  $\omega_3 = 1$  (disallowing positive selection) on the defined test/  
43 foreground branches. Model fit was tested using likelihood ratio test statistics (LRT), comparing  
44 twice the log-likelihood (logL) difference to a  $\chi^2$  distribution (df = 2). Significant LRT demonstrate  
45 evidence of positive selection.

| DS <sup>a</sup>                            | Alternative Model |                     |                |                |                     |                |                | Null Model |                     |                |                  |                     |                |                | LRT<br>(p-value) |
|--------------------------------------------|-------------------|---------------------|----------------|----------------|---------------------|----------------|----------------|------------|---------------------|----------------|------------------|---------------------|----------------|----------------|------------------|
|                                            | logL              | Foreground Branches |                |                | Background Branches |                |                | logL       | Foreground Branches |                |                  | Background Branches |                |                |                  |
|                                            |                   | $\omega_1$ (%)      | $\omega_2$ (%) | $\omega_3$ (%) | $\omega_1$ (%)      | $\omega_2$ (%) | $\omega_3$ (%) |            | $\omega_1$ (%)      | $\omega_2$ (%) | $\omega_3^b$ (%) | $\omega_1$ (%)      | $\omega_2$ (%) | $\omega_3$ (%) |                  |
| <b>Genotype</b>                            |                   |                     |                |                |                     |                |                |            |                     |                |                  |                     |                |                |                  |
| I                                          | See sublinages    |                     |                |                |                     |                |                |            |                     |                |                  |                     |                |                |                  |
| <b>II</b>                                  | -10,579.70        | 0.05                | 0.61           | 2.55           | 0.03                | 0.08           | 7.76           | -10,579.70 | 0.03                | 0.72           | 1.00             | 0.03                | 0.08           | 7.76           | 1.00             |
|                                            |                   | (81.47)             | (14.95)        | (3.59)         | (82.84)             | (14.35)        | (2.81)         |            | (73.34)             | (22.00)        | (4.66)           | (82.85)             | (14.35)        | (2.80)         |                  |
| <b>III</b>                                 | -10,577.70        | 0.24                | 0.26           | 1.01           | 0.02                | 0.12           | 8.72           | n.a.       | n.a.                | n.a.           | n.a.             | n.a.                | n.a.           | n.a.           | 1.00             |
|                                            |                   | (94.41)             | (5.59)         | (0.00)         | (79.09)             | (18.45)        | (2.46)         |            |                     |                |                  |                     |                |                |                  |
| <b>IV</b>                                  | -10,573.90        | 0.33                | 0.33           | 1.46           | 0.03                | 0.17           | 9.20           | n.a.       | n.a.                | n.a.           | n.a.             | n.a.                | n.a.           | n.a.           | 1.00             |
|                                            |                   | (90.60)             | (9.40)         | (0.00)         | (90.10)             | (7.60)         | (2.29)         |            |                     |                |                  |                     |                |                |                  |
| <b>Sublinage</b>                           |                   |                     |                |                |                     |                |                |            |                     |                |                  |                     |                |                |                  |
| <b>Ia</b>                                  | -10,578.30        | 0.00                | 0.14           | 3.60           | 0.03                | 0.20           | 10.32          | -10,579.90 | 0.00                | 0.00           | 1.00             | 0.03                | 0.14           | 10.28          | 0.204            |
|                                            |                   | (77.84)             | (16.02)        | (6.14)         | (89.70)             | (8.14)         | (2.17)         |            | (22.82)             | (53.64)        | (23.54)          | (89.70)             | (8.13)         | (2.18)         |                  |
| <b>Ib</b>                                  | -10,579.60        | 0.09                | 0.26           | 2.37           | 0.03                | 0.08           | 7.78           | -10,579.60 | 0.09                | 0.45           | 1.00             | 0.03                | 0.07           | 7.78           | 1.00             |
|                                            |                   | (65.34)             | (28.63)        | (6.03)         | (87.46)             | (9.79)         | (2.76)         |            | (59.53)             | (33.89)        | (6.58)           | (87.46)             | (9.78)         | (2.76)         |                  |
| <b>Ic</b>                                  | -10,578.10        | 0.15                | 0.17           | 266.70         | 0.02                | 0.08           | 7.12           | -10,582.20 | 0.00                | 0.17           | 1.00             | 0.03                | 0.07           | 7.14           | <b>0.02</b>      |
|                                            |                   | (8.20)              | (91.69)        | (0.11)         | (82.67)             | (14.29)        | (3.05)         |            | (80.07)             | (0.00)         | (19.93)          | (83.70)             | (14.27)        | (3.02)         |                  |
| <b>Id</b>                                  | -10,575.40        | 0.40                | 0.44           | 1.00           | 0.03                | 0.10           | 8.18           | n.a.       | n.a.                | n.a.           | n.a.             | n.a.                | n.a.           | n.a.           | 1.00             |
|                                            |                   | (99.91)             | (0.09)         | (0.00)         | (83.29)             | (14.14)        | (2.57)         |            |                     |                |                  |                     |                |                |                  |
| <b>Ie</b>                                  | n.a.              | n.a.                | n.a.           | n.a.           | n.a.                | n.a.           | n.a.           | n.a.       | n.a.                | n.a.           | n.a.             | n.a.                | n.a.           | n.a.           | n.a.             |
| <b>If</b>                                  | n.a.              | n.a.                | n.a.           | n.a.           | n.a.                | n.a.           | n.a.           | n.a.       | n.a.                | n.a.           | n.a.             | n.a.                | n.a.           | n.a.           | n.a.             |
| <b>IVa</b>                                 | -10,577.30        | 0.32                | 0.51           | 1.00           | 0.03                | 0.07           | 7.86           | n.a.       | n.a.                | n.a.           | n.a.             | n.a.                | n.a.           | n.a.           | 1.00             |
|                                            |                   | (93.90)             | (0.00)         | (6.10)         | (89.09)             | (8.25)         | (2.66)         |            |                     |                |                  |                     |                |                |                  |
| <b>IVb</b>                                 | n.a.              | n.a.                | n.a.           | n.a.           | n.a.                | n.a.           | n.a.           | n.a.       | n.a.                | n.a.           | n.a.             | n.a.                | n.a.           | n.a.           | n.a.             |
| <b>Clade</b>                               |                   |                     |                |                |                     |                |                |            |                     |                |                  |                     |                |                |                  |
| <b>Ia-1</b>                                | -10,579.20        | 0.01                | 0.12           | 3.48           | 0.03                | 0.11           | 8.42           | -10,579.40 | 0.00                | 0.00           | 1.00             | 0.03                | 0.05           | 8.48           | 0.79             |
|                                            |                   | (82.41)             | (12.27)        | (5.32)         | (88.70)             | (8.64)         | (2.67)         |            | (15.70)             | (63.89)        | (20.46)          | (88.77)             | (8.58)         | (2.64)         |                  |
| <b>Ia-2</b>                                | -10,579.80        | 0.00                | 0.00           | 5.95           | 0.03                | 0.10           | 7.82           | -10,582.70 | 0.00                | 0.00           | 1.00             | 0.03                | 0.07           | 7.88           | <b>0.05</b>      |
|                                            |                   | (10.01)             | (85.87)        | (4.12)         | (86.67)             | (10.54)        | (2.87)         |            | (3.78)              | (73.48)        | (22.75)          | (86.66)             | (10.59)        | (2.75)         |                  |
| <b>Ia-3</b>                                | n.a.              | n.a.                | n.a.           | n.a.           | n.a.                | n.a.           | n.a.           | n.a.       | n.a.                | n.a.           | n.a.             | n.a.                | n.a.           | n.a.           | n.a.             |
| <b>Ia-4</b>                                | n.a.              | n.a.                | n.a.           | n.a.           | n.a.                | n.a.           | n.a.           | n.a.       | n.a.                | n.a.           | n.a.             | n.a.                | n.a.           | n.a.           | n.a.             |
| <b>Rainbow trout vs. non-rainbow trout</b> |                   |                     |                |                |                     |                |                |            |                     |                |                  |                     |                |                |                  |
| <b>RT</b>                                  | -10,576.90        | 0.00                | 0.01           | 4.61           | 0.03                | 0.23           | 8.36           | -10,582.90 | 0.00                | 0.00           | 1.00             | 0.03                | 0.20           | 8.37           | <b>0.002</b>     |
|                                            |                   | (79.43)             | (14.78)        | (5.78)         | (90.36)             | (7.58)         | (2.06)         |            | (20.04)             | (55.01)        | (24.95)          | (90.36)             | (7.58)         | (2.06)         |                  |

46 <sup>a</sup> Datasets (DS) in bold were submitted to molecular evolutionary analysis using BUSTED. Datasets are defined as  
47 described in Table 1 and Table 2.

48 <sup>b</sup>  $\omega_3$  constrained to 1 (neutral), disallowing positive selection in the test branches.

49 Applied abbreviations: n.a. ~ not analysed

50 **Table A5:** Inferring amino acid (aa) sites under positive selection pressure in the VHSV G protein  
51 using the **F**ast, **U**nconstraint **B**ayesian **A**ppRoXimation (FUBAR) algorithm implemented in the  
52 HyPhy software package with associated posterior probability estimates and potential functional  
53 relevance. FUBAR analysis was conducted using the online version implemented at datamonkey.org  
54 and applying default settings: 5 MCMC chains conducted, chain length set to 2,000,000, burn-in of  
55 1,000,000 samples, 100 samples drawn from each chain, and Dirichlet prior set to 0.5.

| aa Site        | Probability of positive selection <sup>a</sup> |              |              |       | Function                                                            |
|----------------|------------------------------------------------|--------------|--------------|-------|---------------------------------------------------------------------|
|                | Ia                                             | Ia-1         | Ia-2         | Ic    |                                                                     |
| 8 <sup>b</sup> | -                                              | -            | -            | 0.896 | Signal peptide                                                      |
| 212            | 0.925                                          | <b>0.975</b> | 0.788        | -     | Proximity of Cys215                                                 |
| 214            | -                                              | -            | -            | 0.938 | Proximity of Cys215                                                 |
| 229            | <b>0.956</b>                                   | -            | 0.949        | -     | unk.                                                                |
| 258            | <b>0.999</b>                                   | <b>0.998</b> | <b>0.952</b> | -     | Conformation-dependent neutralizing epitope;<br>Proximity of Cys256 |
| 283            | 0.823                                          | -            | -            | -     | Conformation-dependent neutralizing epitope;<br>Proximity of Cys285 |
| 284            | 0.915                                          | 0.841        | -            | -     | Conformation-dependent neutralizing epitope;<br>Proximity of Cys285 |
| 290            | 0.916                                          | -            | <b>0.964</b> | -     | unk.                                                                |
| 371            | 0.790                                          | -            | 0.847        | -     | unk.                                                                |
| 459            | 0.804                                          | -            | -            | -     | unk.                                                                |
| 476            | 0.782                                          | 0.811        | -            | -     | Proximity of membrane, extracellular side                           |
| 486            |                                                | 0.854        | -            | -     |                                                                     |
| 505            | <b>0.987</b>                                   | -            | 0.940        | -     | Proximity of membrane, intracellular side                           |
| 506            | <b>0.997</b>                                   | 0.753        | <b>0.953</b> | -     | Proximity of membrane, intracellular side                           |

56 <sup>a</sup> Values in bold indicate posterior probability above 95%, missing values indicate a posterior probability below 70%.

57 <sup>b</sup> Amino acids belonging to the signal peptide, which is removed at the endoplasmic reticulum during protein synthesis;

58 Applied abbreviations: unk. ~ unknown
